# Supplementary material
Source: Springer Nature journal article supplement (https://www.springermedizin.de/resource/supplementary/13063_2010_512_MOESM1_ESM.pdf/9618132)

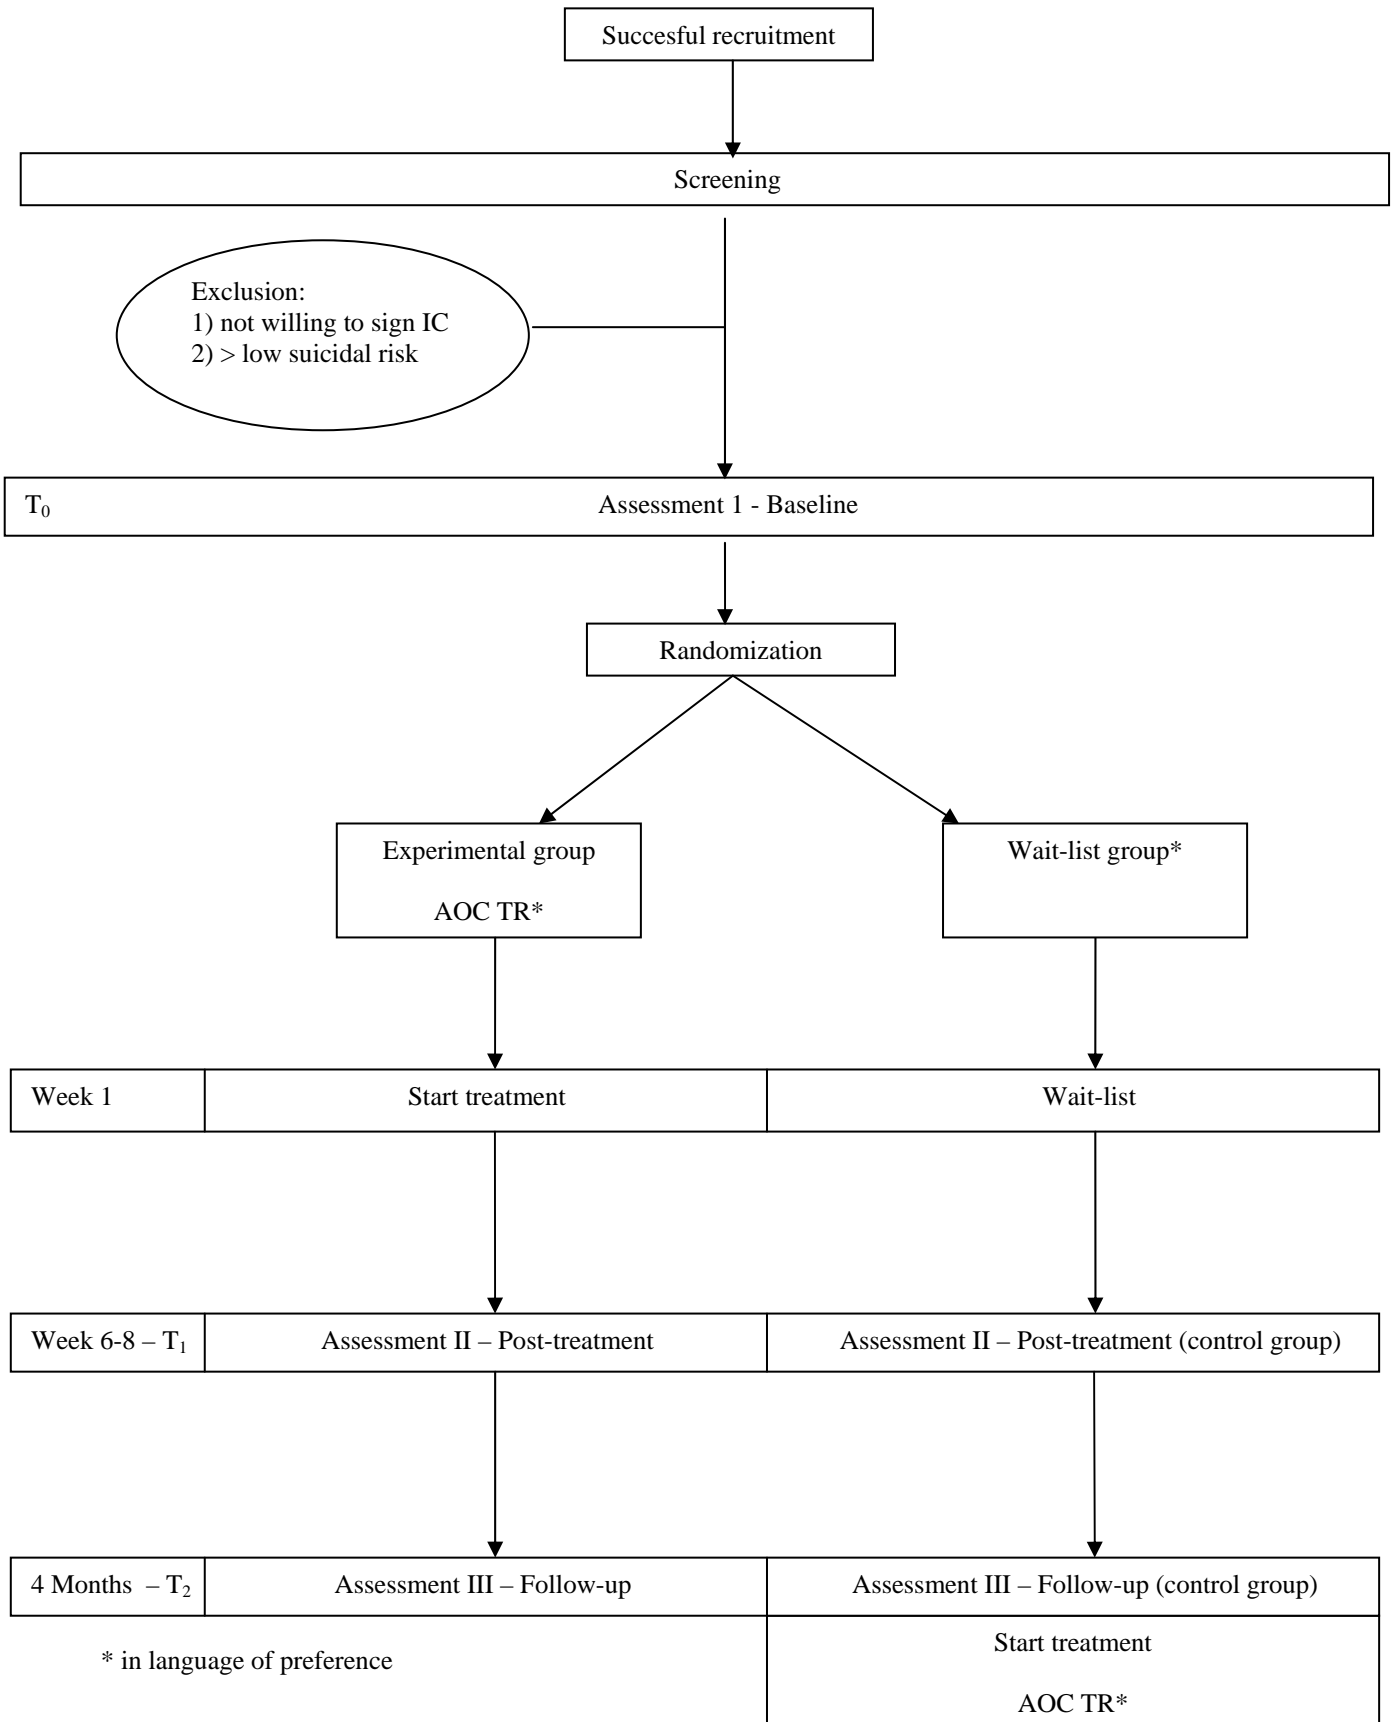

\* in language of preference

Supplement: MOESM1 [file 9618132]
